# Supplementary material for: Suppression of SHROOM1 Improves In Vitro and In Vivo Gene Integration by Promoting Homology-Directed Repair
Source: MDPI journal article supplement (doi:10.3390/ijms21165821), 2020-08-13

Figure 5b

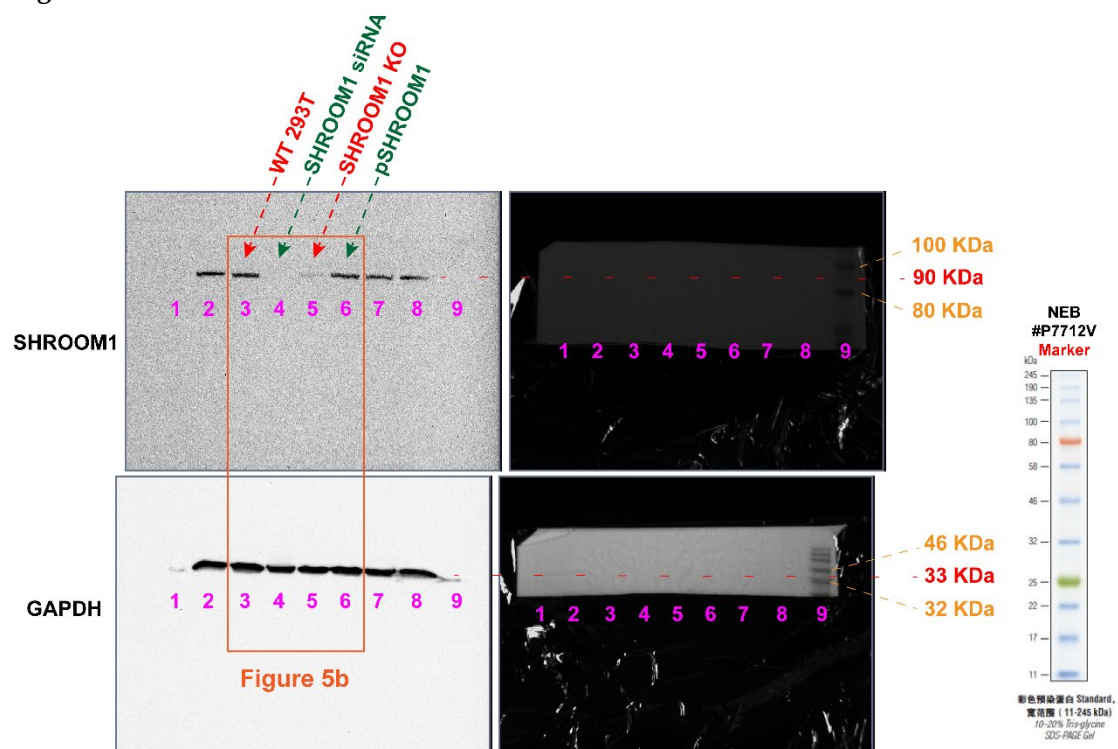

Supplementary Figure S4a

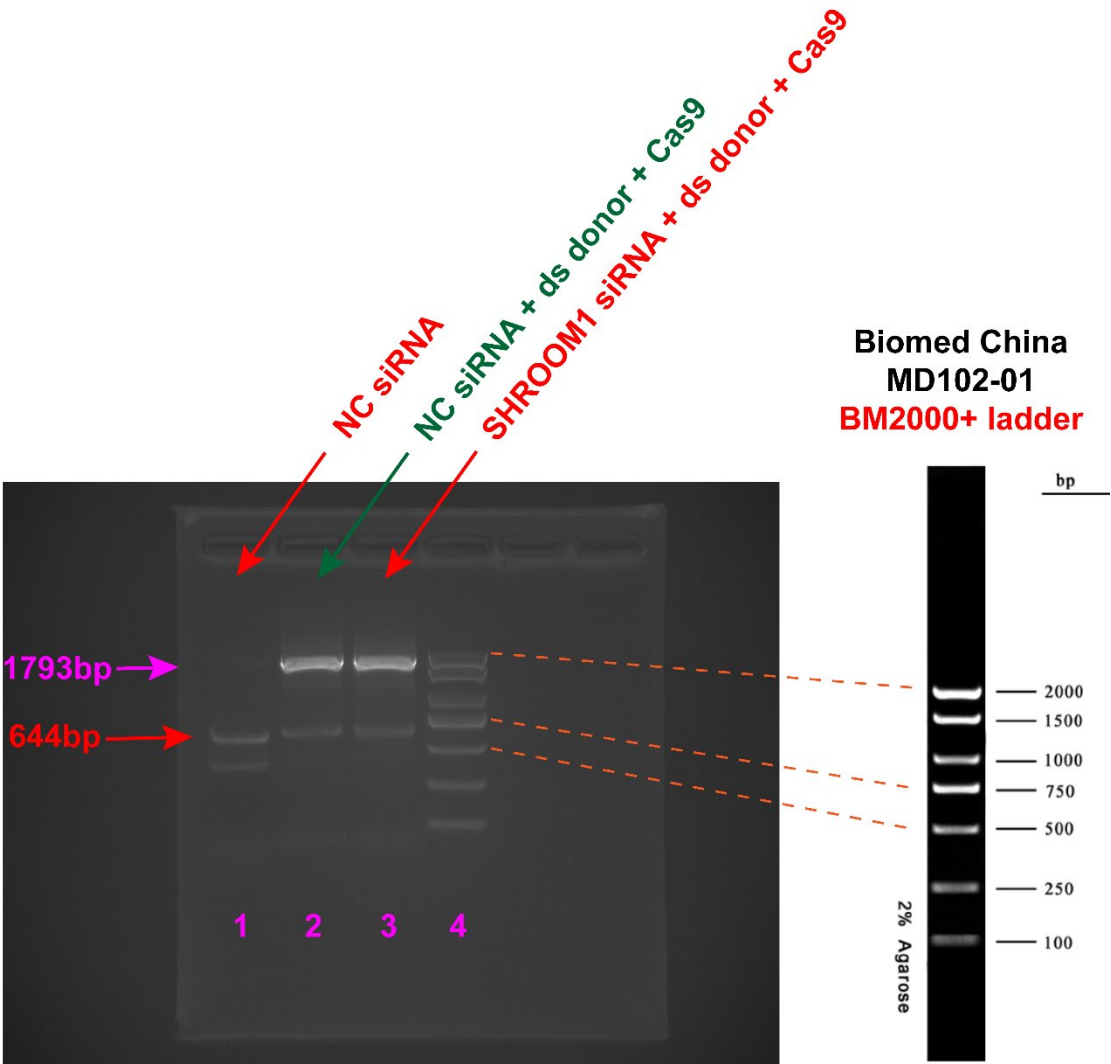

Supplementary Figure S4d

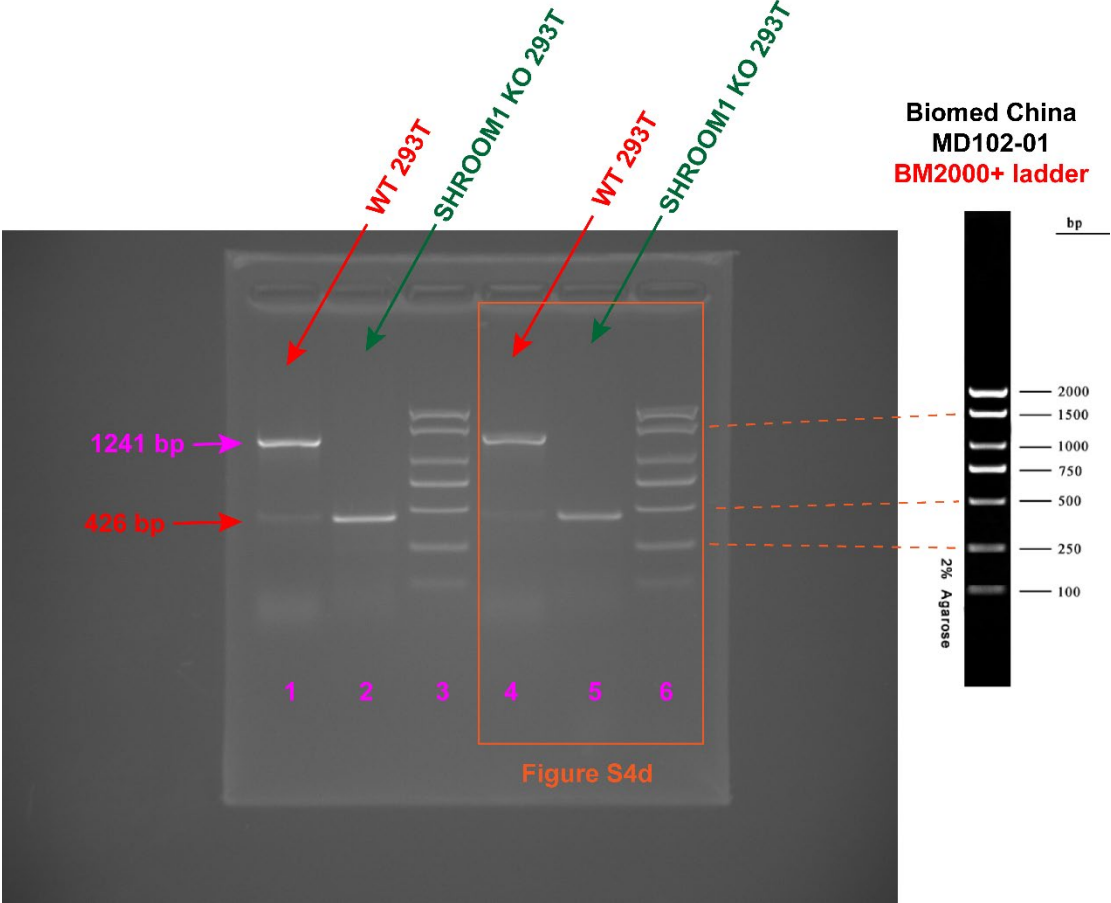

Supplementary Figure S5b

Ddx4 locus  
13.3 pg NC siRNA

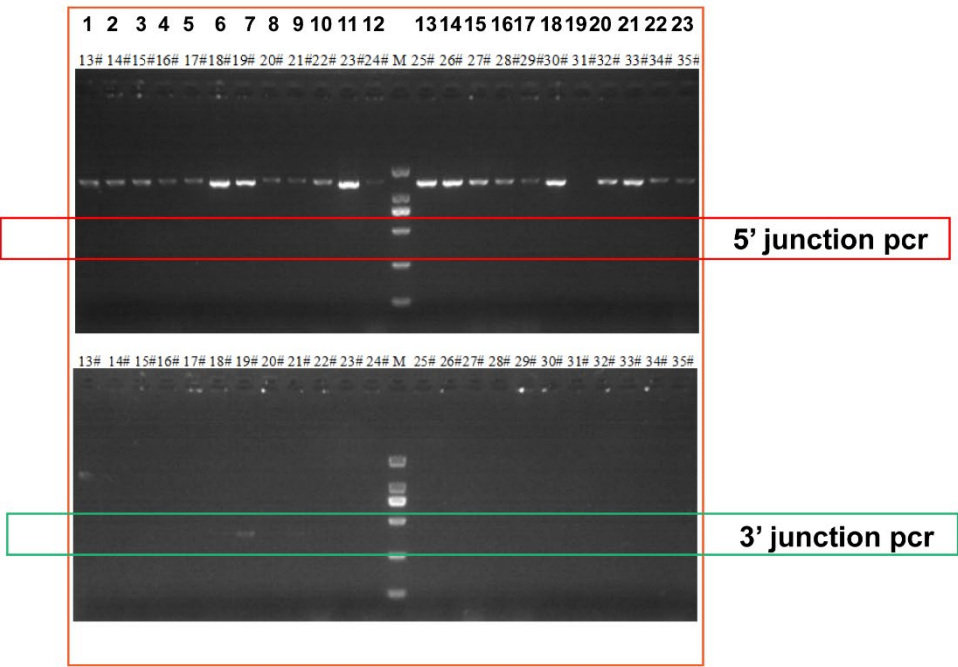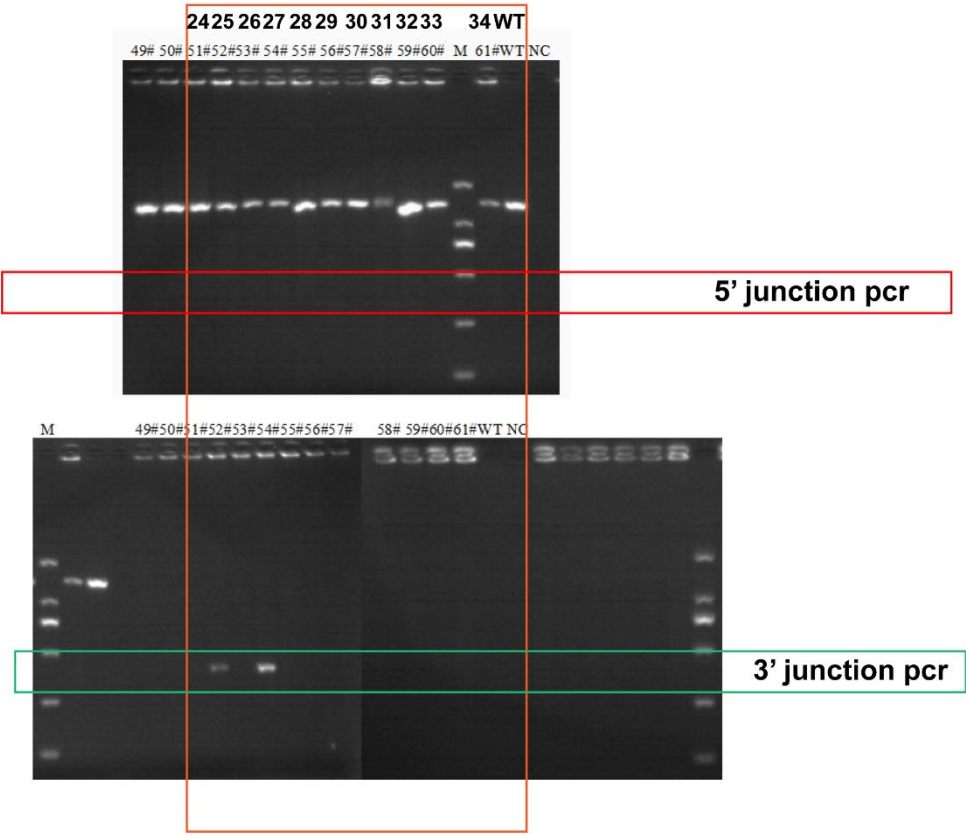

Supplementary Figure S5b

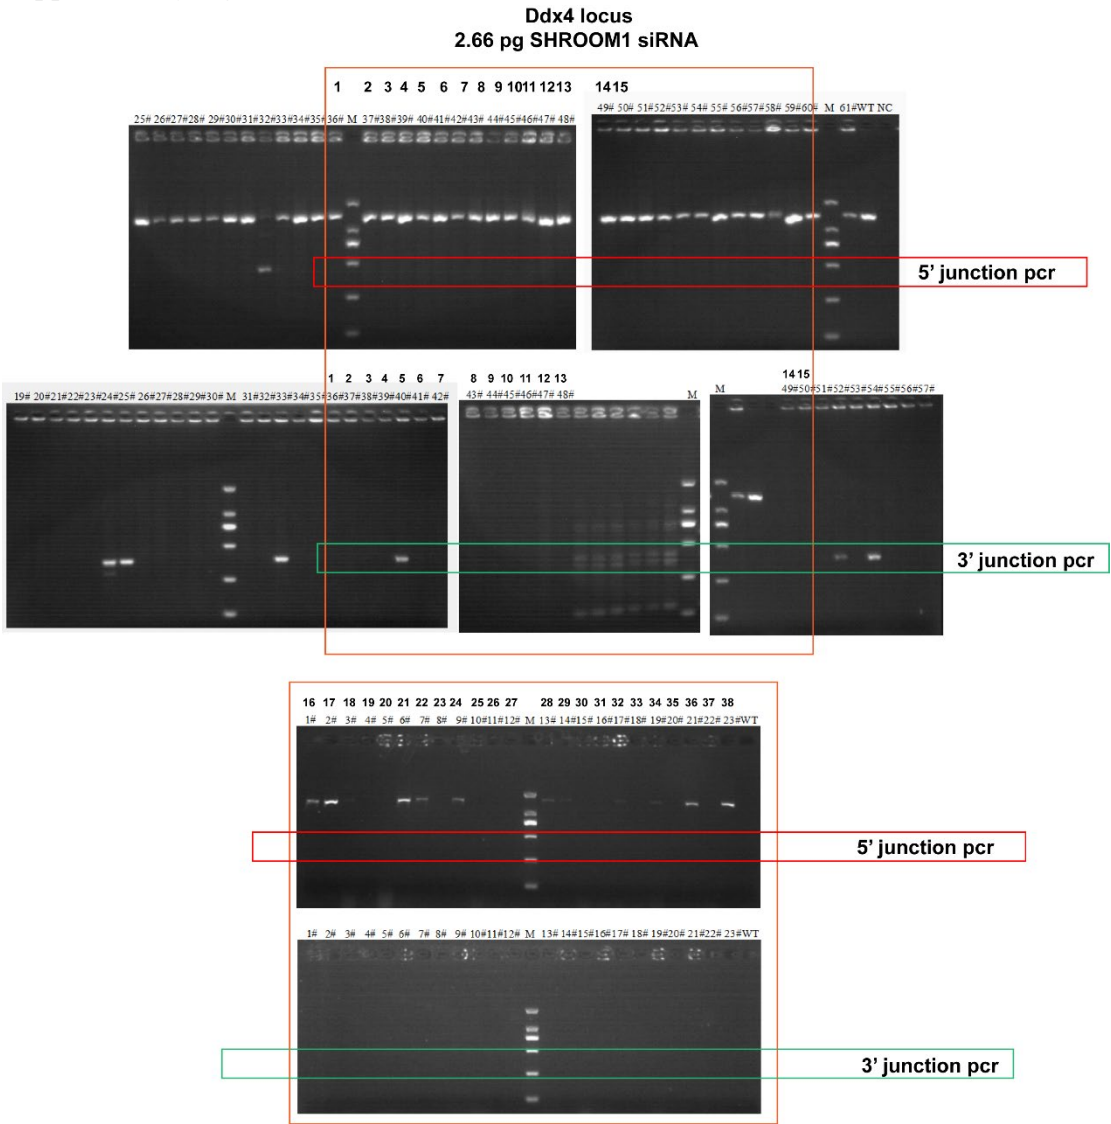

Supplementary Figure S5b

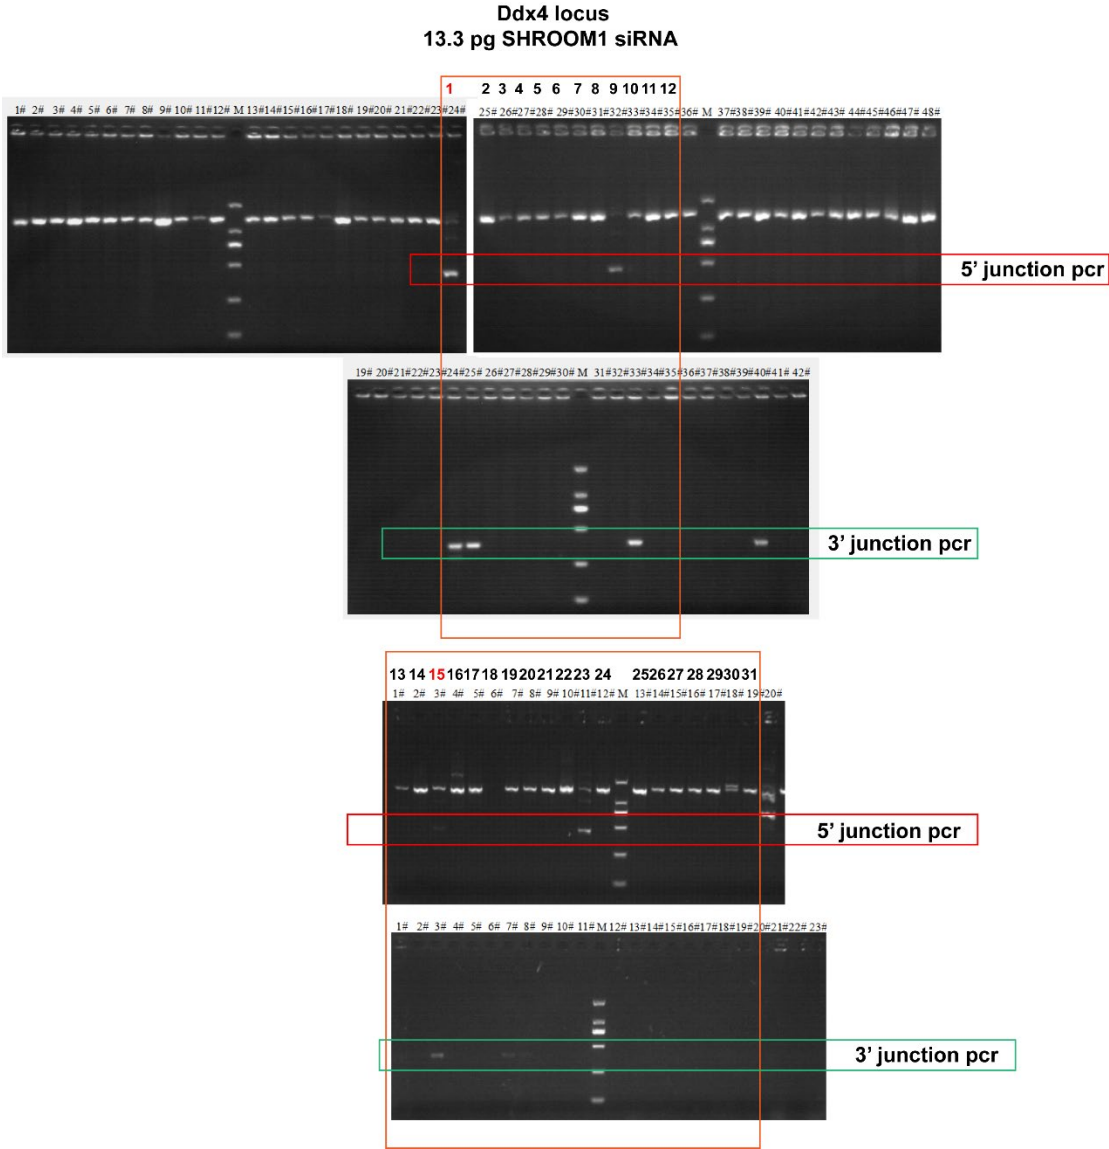

Supplementary Figure S5c

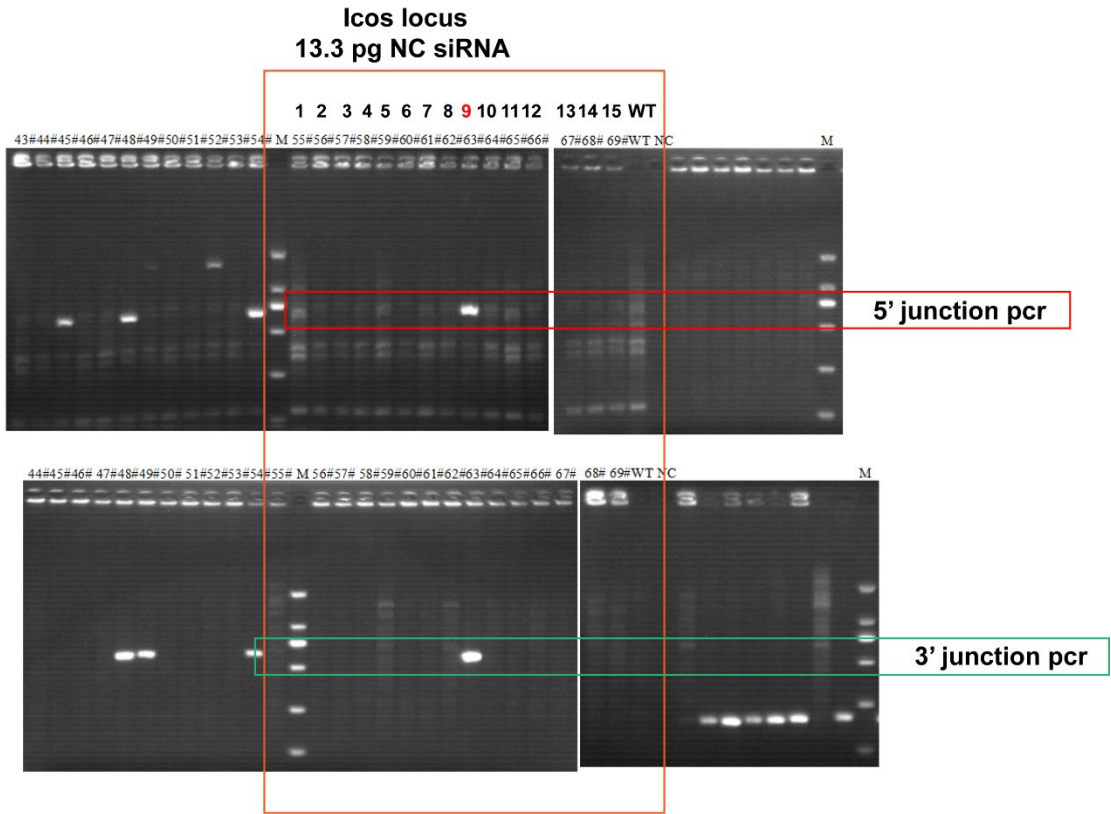

Supplementary Figure S5c

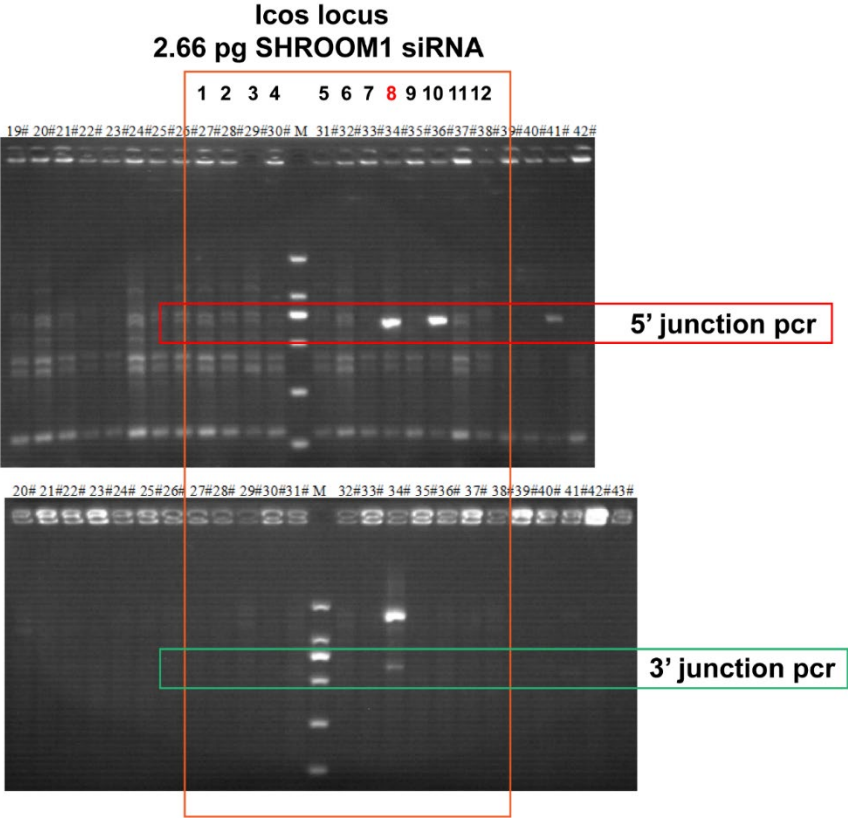



Supplementary Figure S5c

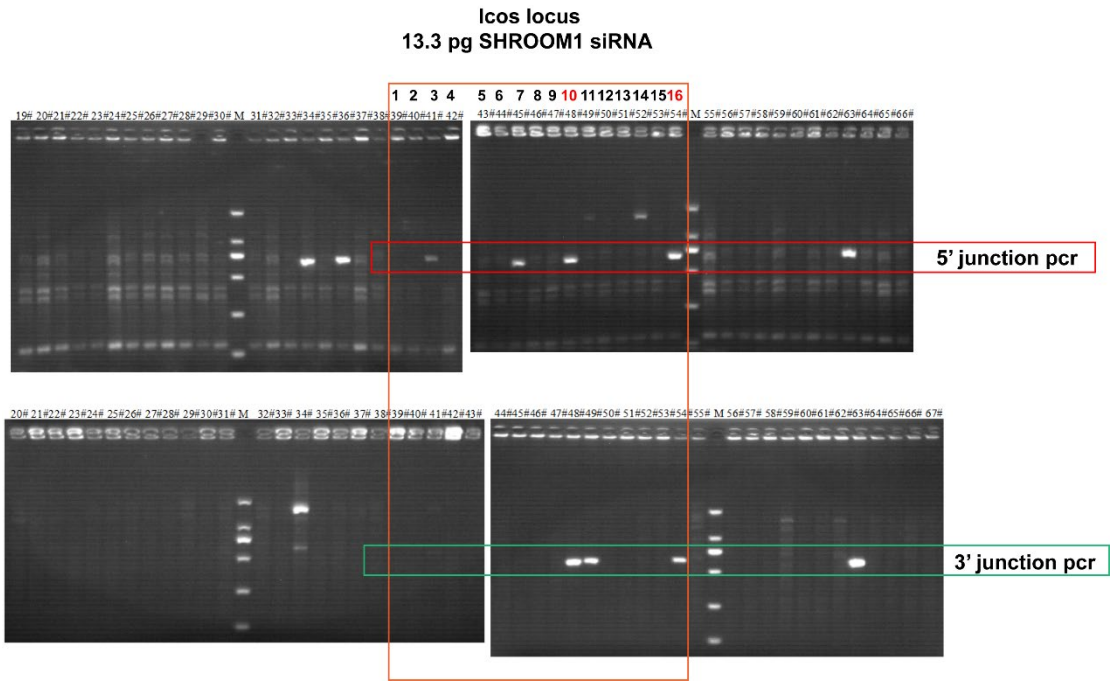

Supplement: s1 [file s1]
